# Supplementary material
Source: publisher figshare collection journal article supplement (https://plos.figshare.com/articles/dataset/_/949320)
Supplement: Supplementary file [file 1]

## Antibodies used

| <u>Antibody designation</u> | <u>Source</u> | <u>aa-Position</u> |
|-----------------------------|---------------|--------------------|
| <b><u>Perilipin</u></b>     |               |                    |
| mab Peri 112.17.1           | m             | 1-20               |
| pab Peri-h+NT               | gp            | 1-20               |
| pab Peri-hCT                | gp            | 507-519            |
| <b><u>Adipophilin</u></b>   |               |                    |
| mab AP125                   | m             | 6-28               |
| pab Adipo-hCT               | gp            | 423-437            |
| <b><u>TIP47</u></b>         |               |                    |
| pab TIP47-hCT               | gp            | 420-431            |
| <b><u>S3-12</u></b>         |               |                    |
| pab S3-12-hNT               | gp            | 1-15               |
| pab S3-12-hCT               | gp            | 1385-1400          |
| <b><u>Vimentin</u></b>      |               |                    |
| mab VIM 3B4                 | m             | bVimentin          |
| <b><u>VE-Cadherin</u></b>   |               |                    |
| mab BV9                     | m             |                    |

Table S1
