# Supplementary material
Source: publisher figshare collection journal article supplement (https://plos.figshare.com/articles/dataset/_/949320)
Supplement: Supplementary file [file 1]

# Table S2a

IP : Poietics AIM

Peri 112.17.1 mab

## A1

| Hit No. | Accession No. | Protein Description                                                                | Score | Mass [Da] | Matches | Coverage [%] |                                                                                                |
|---------|---------------|------------------------------------------------------------------------------------|-------|-----------|---------|--------------|------------------------------------------------------------------------------------------------|
| 12      | gi 179212     | Na+ K+ ATPase alpha subunit, partial                                               | 274   | 82706     | 10      | 8,8          | integral plasma membrane protein,                                                              |
| 16      | gi 181184     | stomatin peptide                                                                   | 118   | 31860     | 3       | 11,1         | lipid raft-associated integral membrane protein                                                |
| 17      | gi 31092      | unnamed protein product                                                            | 110   | 50437     | 5       | 5,6          | elongation factor                                                                              |
| 19      | gi 4506675    | dolichyl-diphosphooligosaccharide--protein glycosyltransferase subunit 1 precursor | 102   | 68641     | 4       | 6,1          | sugar transfer from dolichol-phosphate-sugars occurs exclusively on the luminal side of the ER |
| 20      | gi 2414516    | surface 4 integral membrane protein                                                | 101   | 28724     | 3       | 12,2         |                                                                                                |
| 24      | gi 4757756    | annexin A2 isoform 2                                                               | 86    | 38808     | 2       | 6,8          | calcium-dependent phospholipid-binding protein                                                 |

## A2

| Hit No. | Accession No. | Protein Description                                                                | Score | Mass [Da] | Matches | Coverage [%] |                                                                                                                      |
|---------|---------------|------------------------------------------------------------------------------------|-------|-----------|---------|--------------|----------------------------------------------------------------------------------------------------------------------|
| 1       | gi 61743954   | neuroblast differentiation-associated protein AHNAK isoform 1                      | 1591  | 629213    | 70      | 9            | AHNAK binds annexin and works together in the developement of intracellular membranes                                |
| 2       | gi 15620821   | KIAA1881 protein                                                                   | 976   | 133891    | 27      | 17,8         | S3-12, lipid droplet-binding                                                                                         |
| 4       | gi 219841772  | COL6A3 protein                                                                     | 754   | 279629    | 20      | 8,4          |                                                                                                                      |
| 8       | gi 41584442   | fatty acid synthase                                                                | 243   | 275900    | 8       | 3            | multi-enzyme, catalyzes the synthesis of palmitate from acetyl-CoA & malonyl-CoA to long-chain saturated fatty acids |
| 11      | gi 3299885    | ES/130                                                                             | 187   | 109019    | 5       | 6,9          | ribosome receptor                                                                                                    |
| 12      | gi 34339      | LDL-receptor related precursor (AA -19 to 4525)                                    | 181   | 523119    | 5       | 1,2          | central role in mammalian cholesterol metabolism; the receptor protein mammalian cholesterol metabolism              |
| 15      | gi 181184     | stomatin peptide                                                                   | 147   | 31860     | 4       | 9,4          | lipid raft-associated integral membrane protein                                                                      |
| 18      | gi 4502119    | membrane primary amine oxidase                                                     | 99    | 85138     | 3       | 2,6          | oxidative conversion of amines to aldehydes, major protein on the adipocyte plasma membrane                          |
| 25      | gi 16945323   | CD92 protein                                                                       | 70    | 74473     | 3       | 4            | plasma-membrane choline transporter                                                                                  |
| 26      | gi 4506675    | dolichyl-diphosphooligosaccharide--protein glycosyltransferase subunit 1 precursor | 69    | 68641     | 2       | 3,8          | sugar transfer from dolichol-phosphate-sugars occurs exclusively on the luminal side of the ER                       |

## A3

| Hit No. | Accession No. | Protein Description                                                                | Score | Mass [Da] | Matches | Coverage [%] |                                                                                                                      |
|---------|---------------|------------------------------------------------------------------------------------|-------|-----------|---------|--------------|----------------------------------------------------------------------------------------------------------------------|
| 1       | gi 119591516  | collagen, type VI, alpha 3, isoform CRA_h                                          | 2249  | 323451    | 85      | 19,7         |                                                                                                                      |
| 2       | gi 61743954   | neuroblast differentiation-associated protein AHNAK isoform 1                      | 1435  | 629213    | 61      | 9,3          | AHNAK binds annexin and works together in the developement of intracellular membranes                                |
| 3       | gi 12667788   | myosin-9                                                                           | 1352  | 227646    | 53      | 18,9         |                                                                                                                      |
| 4       | gi 41584442   | fatty acid synthase                                                                | 1270  | 275900    | 38      | 13,5         | multi-enzyme, catalyzes the synthesis of palmitate from acetyl-CoA & malonyl-CoA to long-chain saturated fatty acids |
| 5       | gi 15620821   | KIAA1881 protein                                                                   | 1185  | 133891    | 33      | 20,5         | S3-12, lipid droplet-binding                                                                                         |
| 7       | gi 7305053    | myoferlin isoform a                                                                | 846   | 236100    | 27      | 10,3         | calcium/phospholipid-binding protein                                                                                 |
| 9       | gi 34339      | LDL-receptor related precursor (AA -19 to 4525)                                    | 634   | 523119    | 24      | 4,5          | central role in mammalian cholesterol metabolism; the receptor protein mammalian cholesterol metabolism              |
| 10      | gi 31397      | fibronectin precursor                                                              | 624   | 260064    | 23      | 10           |                                                                                                                      |
| 11      | gi 4235275    | talin                                                                              | 511   | 271828    | 16      | 7,2          |                                                                                                                      |
| 14      | gi 178536     | aminopeptidase N precursor (EC 3.4.11.2)                                           | 429   | 109842    | 13      | 13,3         |                                                                                                                      |
| 15      | gi 189730     | platelet-derived growth factor receptor                                            | 365   | 124959    | 11      | 11,6         |                                                                                                                      |
| 16      | gi 181184     | stomatin peptide                                                                   | 333   | 31860     | 9       | 28,5         | lipid raft-associated integral membrane protein                                                                      |
| 17      | gi 28243      | unnamed protein product                                                            | 326   | 283323    | 11      | 4,2          | actin-binding protein (ABP-280, nonmuscle filamin)                                                                   |
| 18      | gi 3299885    | ES/130                                                                             | 317   | 109019    | 7       | 7,9          | ribosome receptor                                                                                                    |
| 19      | gi 1418928    | prepro-alpha1(I) collagen                                                          | 308   | 139853    | 12      | 6,9          |                                                                                                                      |
| 20      | gi 4506787    | ras GTPase-activating-like protein IQGAP1                                          | 281   | 189761    | 9       | 4,4          | interacts with components of the cytoskeleton & adhesion molecules to regulate cell morphology & motility            |
| 21      | gi 4758012    | clathrin heavy chain 1                                                             | 246   | 193260    | 7       | 4,4          | involved in endocytosis                                                                                              |
| 22      | gi 28336      | mutant beta-actin (beta'-actin)                                                    | 235   | 42128     | 12      | 22,1         |                                                                                                                      |
| 23      | gi 35655      | unnamed protein product                                                            | 226   | 57458     | 10      | 18,9         | folding in ER                                                                                                        |
| 26      | gi 2104553    | Myosin heavy chain (MHY11) (5'partial)                                             | 202   | 215017    | 9       | 2,7          |                                                                                                                      |
| 27      | gi 179106     | nonerythroid alpha-spectrin                                                        | 187   | 284905    | 4       | 2,2          |                                                                                                                      |
| 29      | gi 930045     | alpha-1 (III) collagen                                                             | 177   | 96556     | 7       | 6,6          |                                                                                                                      |
| 30      | gi 5531849    | SURF-4 isoform                                                                     | 173   | 18186     | 7       | 40,9         | surface integral membrane protein                                                                                    |
| 32      | gi 4218955    | gamma-filamin                                                                      | 157   | 291287    | 4       | 1,5          | actin-binding                                                                                                        |
| 34      | gi 16945323   | CD92 protein                                                                       | 137   | 74473     | 5       | 7,5          | plasma-membrane choline transporter                                                                                  |
| 41      | gi 4506675    | dolichyl-diphosphooligosaccharide--protein glycosyltransferase subunit 1 precursor | 91    | 68641     | 2       | 3,8          | sugar transfer from dolichol-phosphate-sugars occurs exclusively on the luminal side of the ER                       |
| 45      | gi 4757756    | annexin A2 isoform 2                                                               | 82    | 38808     | 4       | 7,4          | calcium-dependent phospholipid-binding protein                                                                       |
| 46      | gi 342350777  | Chain A, Human Annexin V With Incorporated Methionine Analogue Azidohomoalanine    | 73    | 35811     | 3       | 6,9          | calcium-dependent phospholipid-binding protein                                                                       |

## A4

| Hit No. | Accession No. | Protein Description                                           | Score | Mass [Da] | Matches | Coverage [%] |                                                                                                                      |
|---------|---------------|---------------------------------------------------------------|-------|-----------|---------|--------------|----------------------------------------------------------------------------------------------------------------------|
| 3       | gi 41584442   | fatty acid synthase                                           | 1161  | 275900    | 38      | 11,8         | multi-enzyme, catalyzes the synthesis of palmitate from acetyl-CoA & malonyl-CoA to long-chain saturated fatty acids |
| 8       | gi 119589620  | hCG1646516                                                    | 735   | 133590    | 22      | 13,7         | S3-12, lipid droplet-binding                                                                                         |
| 9       | gi 61743954   | neuroblast differentiation-associated protein AHNAK isoform 1 | 543   | 629213    | 21      | 3            | AHNAK binds annexin and works together in the developement of intracellular membranes                                |
| 10      | gi 4507877    | vinculin isoform VCL                                          | 515   | 117220    | 14      | 12,7         |                                                                                                                      |
| 11      | gi 12667788   | myosin-9                                                      | 499   | 227646    | 15      | 7,9          |                                                                                                                      |
| 12      | gi 87196339   | collagen alpha-1(VI) chain precursor                          | 461   | 109602    | 19      | 13,6         |                                                                                                                      |
| 13      | gi 5453832    | hypoxia up-regulated protein 1 precursor                      | 433   | 111494    | 24      | 16,6         | endoplasmic reticulum (ER) under hypoxic conditions                                                                  |
| 14      | gi 28336      | mutant beta-actin (beta'-actin)                               | 431   | 42128     | 21      | 35,7         |                                                                                                                      |
| 15      | gi 4504763    | integrin alpha-V isoform 1 precursor                          | 431   | 117062    | 15      | 13,9         |                                                                                                                      |
| 16      | gi 19743813   | integrin beta-1 isoform 1A precursor                          | 410   | 91664     | 22      | 14,8         |                                                                                                                      |
| 18      | gi 189730     | platelet-derived growth factor receptor                       | 377   | 124959    | 11      | 10,3         |                                                                                                                      |
| 19      | gi 7305053    | myoferlin isoform a                                           | 376   | 236100    | 13      | 5,4          | calcium/phospholipid-binding protein                                                                                 |

|    |             |                                                       |     |        |    |      |                                                                                                         |
|----|-------------|-------------------------------------------------------|-----|--------|----|------|---------------------------------------------------------------------------------------------------------|
| 20 | gi 458032   | aspartyl beta-hydroxylase                             | 362 | 85958  | 12 | 19,4 |                                                                                                         |
| 21 | gi 34339    | LDL-receptor related precursor (AA -19 to 4525)       | 352 | 523119 | 14 | 2,7  | central role in mammalian cholesterol metabolism; the receptor protein mammalian cholesterol metabolism |
| 22 | gi 1418928  | prepro-alpha1(I) collagen                             | 319 | 139853 | 8  | 5,6  |                                                                                                         |
| 23 | gi 41350923 | Collagen, type VI, alpha 2                            | 275 | 109736 | 9  | 6,7  |                                                                                                         |
| 24 | gi 4757756  | annexin A2 isoform 2                                  | 274 | 38808  | 9  | 19,2 | calcium-dependent phospholipid-binding protein                                                          |
| 26 | gi 3882215  | KIAA0747 protein                                      | 256 | 120296 | 9  | 7,5  | synaptotagmin_like                                                                                      |
| 27 | gi 4235275  | talin                                                 | 247 | 271828 | 6  | 3    |                                                                                                         |
| 28 | gi 68533085 | MYO1C variant protein                                 | 246 | 125833 | 5  | 4,6  |                                                                                                         |
| 29 | gi 603074   | ATP:citrate lyase                                     | 242 | 121660 | 6  | 7,4  | cleaves citryl-CoA (CiCoA) to acetyl-CoA                                                                |
| 30 | gi 19263767 | Similar to cytoskeleton-associated protein 4, partial | 225 | 62194  | 5  | 13,6 |                                                                                                         |
| 31 | gi 31438    | unnamed protein product                               | 220 | 115577 | 5  | 4,7  | integrin                                                                                                |
| 32 | gi 4758012  | clathrin heavy chain 1                                | 216 | 193260 | 8  | 4,2  | involved in endocytosis                                                                                 |
| 33 | gi 35655    | unnamed protein product                               | 215 | 57458  | 8  | 13,6 | oxidative protein folding in the ER                                                                     |
| 34 | gi 1418930  | prepro-alpha2(I) collagen                             | 211 | 129772 | 6  | 6    |                                                                                                         |
| 35 | gi 181184   | stomatin peptide                                      | 209 | 31860  | 6  | 19,1 | lipid raft-associated integral membrane protein                                                         |
| 38 | gi 296164   | 156 kDa Protein                                       | 185 | 156282 | 4  | 3,9  | kinectin, perinuclear and ER                                                                            |

#### A5

| Hit No. | Accession No. | Protein Description                                                   | Score | Mass [Da] | Matches | Coverage [%] |                                                                                                                      |
|---------|---------------|-----------------------------------------------------------------------|-------|-----------|---------|--------------|----------------------------------------------------------------------------------------------------------------------|
| 1       | gi 15010550   | heat shock protein gp96 precursor                                     | 1179  | 90309     | 60      | 31,1         |                                                                                                                      |
| 2       | gi 116256327  | neprilysin                                                            | 1176  | 86144     | 64      | 38,5         |                                                                                                                      |
| 6       | gi 577295     | KIAA0088                                                              | 746   | 107158    | 34      | 24,6         | glucosidase                                                                                                          |
| 8       | gi 178536     | aminopeptidase N precursor (EC 3.4.11.2)                              | 630   | 109842    | 24      | 18,1         |                                                                                                                      |
| 9       | gi 55743098   | collagen alpha-3(VI) chain isoform 1 precursor                        | 551   | 345167    | 20      | 6,4          |                                                                                                                      |
| 10      | gi 68533085   | MYO1C variant protein                                                 | 550   | 125833    | 20      | 16,1         |                                                                                                                      |
| 11      | gi 28334      | unnamed protein product                                               | 540   | 103480    | 20      | 19,5         | a-actinin                                                                                                            |
| 12      | gi 306891     | 90kDa heat shock protein                                              | 532   | 83584     | 18      | 17,8         |                                                                                                                      |
| 14      | gi 2804273    | alpha actinin 4                                                       | 456   | 102661    | 16      | 13,6         |                                                                                                                      |
| 15      | gi 33636742   | procollagen-lysine,2-oxoglutarate 5-dioxygenase 2 isoform 1 precursor | 427   | 87784     | 14      | 14,2         |                                                                                                                      |
| 16      | gi 11127638   | GROS1-L protein                                                       | 411   | 84216     | 13      | 15,8         |                                                                                                                      |
| 17      | gi 119589620  | hCG1646516                                                            | 385   | 133590    | 8       | 7,7          | S3-12, lipid droplet-binding                                                                                         |
| 18      | gi 19743813   | integrin beta-1 isoform 1A precursor                                  | 373   | 91664     | 15      | 10,9         |                                                                                                                      |
| 19      | gi 4503483    | elongation factor 2                                                   | 365   | 96246     | 11      | 10,8         |                                                                                                                      |
| 20      | gi 915392     | fatty acid synthase                                                   | 356   | 275542    | 10      | 3,9          | multi-enzyme, catalyzes the synthesis of palmitate from acetyl-CoA & malonyl-CoA to long-chain saturated fatty acids |
| 21      | gi 182855     | 80K-H protein                                                         | 345   | 60228     | 19      | 13,9         | Low Density Lipoprotein Receptor Class A domain cholesterol metabolism                                               |
| 22      | gi 4186038    | glucose 1-dehydrogenase                                               | 329   | 89393     | 10      | 10,6         |                                                                                                                      |
| 23      | gi 32488      | unnamed protein product                                               | 328   | 85020     | 8       | 10,9         | histidine kinase-like ATPases                                                                                        |
| 24      | gi 4757756    | annexin A2 isoform 2                                                  | 318   | 38808     | 13      | 22,7         | calcium-dependent phospholipid-binding protein                                                                       |
| 25      | gi 10716563   | calnexin precursor                                                    | 317   | 67982     | 20      | 10,1         | ER protein                                                                                                           |
| 26      | gi 6424942    | ALG-2 interacting protein 1                                           | 306   | 96646     | 9       | 9,8          | mannosyltransferase                                                                                                  |
| 27      | gi 37433      | unnamed protein product                                               | 278   | 85304     | 10      | 10,7         | transferrin receptor                                                                                                 |
| 28      | gi 516764     | motor protein                                                         | 273   | 79830     | 9       | 12,9         |                                                                                                                      |
| 29      | gi 28336      | mutant beta-actin (beta'-actin)                                       | 259   | 42128     | 12      | 23,7         |                                                                                                                      |
| 30      | gi 386758     | GRP78 precursor, partial                                              | 242   | 72185     | 6       | 11,9         | glucose-regulated protein                                                                                            |
| 35      | gi 307109     | lysosomal membrane glycoprotein-1                                     | 201   | 45201     | 12      | 10,6         |                                                                                                                      |
| 36      | gi 3299885    | ES/130                                                                | 197   | 109019    | 4       | 4,8          | ribosome receptor                                                                                                    |
| 38      | gi 3183975    | MEMD protein                                                          | 188   | 65614     | 7       | 11           | cell adhesion molecule                                                                                               |
| 39      | gi 34339      | LDL-receptor related precursor (AA -19 to 4525)                       | 185   | 523119    | 7       | 1,4          | central role in mammalian cholesterol metabolism; the receptor protein mammalian cholesterol metabolism              |
| 40      | gi 13603394   | type VI collagen alpha 2 chain precursor                              | 184   | 109703    | 5       | 4            |                                                                                                                      |
| 46      | gi 181184     | stomatin peptide                                                      | 128   | 31860     | 4       | 12,5         | lipid raft-associated integral membrane protein                                                                      |
| 51      | gi 6005942    | transitional endoplasmic reticulum ATPase                             | 114   | 89950     | 4       | 6,2          | ER                                                                                                                   |
| 62      | gi 4758012    | clathrin heavy chain 1                                                | 92    | 193260    | 2       | 1,3          | involved in endocytosis                                                                                              |
| 67      | gi 6381989    | adipocyte-derived leucine aminopeptidase                              | 80    | 107689    | 3       | 2,4          | ER peptidase                                                                                                         |
| 69      | gi 15559717   | AP2A1 protein                                                         | 76    | 109096    | 2       | 1            | involved in the formation of clathrin-coated pits                                                                    |
| 75      | gi 799177     | 100 kDa coactivator                                                   | 65    | 100313    | 2       | 2,1          | lipid droplet-binding                                                                                                |

#### A6

| Hit No. | Accession No. | Protein Description                                                                        | Score | Mass [Da] | Matches | Coverage [%] |                                                                                                |
|---------|---------------|--------------------------------------------------------------------------------------------|-------|-----------|---------|--------------|------------------------------------------------------------------------------------------------|
| 1       | gi 16507237   | 78 kDa glucose-regulated protein precursor                                                 | 1991  | 72402     | 120     | 50,6         |                                                                                                |
| 7       | gi 862457     | enoyl-CoA hydratase/3-hydroxyacyl-CoA dehydrogenase alpha-subunit of trifunctional protein | 954   | 83648     | 43      | 31,8         | fatty acid oxidation complex, mitochondrial                                                    |
| 8       | gi 4506675    | dolichyl-diphosphooligosaccharide--protein glycosyltransferase subunit 1 precursor         | 864   | 68641     | 33      | 34,6         | sugar transfer from dolichol-phosphate-sugars occurs exclusively on the luminal side of the ER |
| 9       | gi 292059     | MTHSP75                                                                                    | 819   | 74019     | 19      | 26,4         | 75kD glucose-regulated protein, mitochondrial hsp70                                            |
| 10      | gi 5729877    | heat shock cognate 71 kDa protein isoform 1                                                | 797   | 71082     | 28      | 28,3         |                                                                                                |
| 11      | gi 20072835   | ACSL1 protein, partial                                                                     | 588   | 60800     | 23      | 24,3         |                                                                                                |
| 12      | gi 2851393    | NADPH--cytochrome P450 reductase; Short=CPR; Short=P450R                                   | 585   | 77097     | 17      | 26,1         | anchored to the ER membrane by its N-terminal hydrophobic region.                              |
| 13      | gi 4758304    | protein disulfide-isomerase A4 precursor                                                   | 540   | 73229     | 18      | 18,4         |                                                                                                |
| 14      | gi 35218      | unnamed protein product                                                                    | 532   | 76154     | 14      | 24,4         | membrane-associated Ca2+-binding                                                               |
| 15      | gi 7212807    | EH domain containing 2                                                                     | 521   | 61182     | 21      | 27,1         | endocytosis, vesicle transport, and signal transduction                                        |
| 16      | gi 21410323   | Perilipin                                                                                  | 507   | 56216     | 15      | 26,2         | lipid droplet-binding                                                                          |
| 17      | gi 4557735    | amine oxidase [flavin-containing] A isoform 1                                              | 487   | 60157     | 16      | 28,3         | mitochondrial enzyme                                                                           |

|    |              |                                                                                              |     |        |    |      |                                                                                                                        |
|----|--------------|----------------------------------------------------------------------------------------------|-----|--------|----|------|------------------------------------------------------------------------------------------------------------------------|
| 18 | gi 4504505   | peroxisomal multifunctional enzyme type 2 isoform 2                                          | 467 | 80092  | 11 | 19,7 | involved in the peroxisomal beta-oxidation pathway for fatty acids                                                     |
| 20 | gi 5031631   | lysosome membrane protein 2 isoform 1 precursor                                              | 438 | 54712  | 18 | 20,1 |                                                                                                                        |
| 21 | gi 190074    | lysyl hydroxylase                                                                            | 431 | 84098  | 11 | 16,6 |                                                                                                                        |
| 22 | gi 12231182  | 65kDa FK506-binding protein                                                                  | 426 | 64777  | 13 | 13,1 | derived from cells after 2-weeks retinoic acid (RA) induction                                                          |
| 23 | gi 3273228   | very-long-chain acyl-CoA dehydrogenase                                                       | 422 | 70848  | 14 | 17,1 | catalyzes initial step of mitochondrial beta-oxidation of long-chain fatty acids with chain length of 14 to 20 carbons |
| 24 | gi 35493916  | dolichyl-diphosphooligosaccharide--protein glycosyltransferase subunit 2 isoform 1 precursor | 417 | 69355  | 13 | 25,8 | sugar transfer from dolichol-phosphate-sugars occurs exclusively on the luminal side of the ER                         |
| 25 | gi 178536    | aminopeptidase N precursor (EC 3.4.11.2)                                                     | 289 | 109842 | 10 | 8,3  |                                                                                                                        |
| 26 | gi 34758     | unnamed protein product                                                                      | 279 | 85397  | 6  | 8,1  |                                                                                                                        |
| 27 | gi 119625804 | moesin, isoform CRA_b                                                                        | 274 | 66678  | 9  | 12,5 |                                                                                                                        |
| 28 | gi 52545928  | hypothetical protein                                                                         | 266 | 133214 | 7  | 8,1  | alpha 3 type VI collagen isoform 5 precursor                                                                           |
| 29 | gi 22761234  | unnamed protein product                                                                      | 246 | 67434  | 11 | 10,3 |                                                                                                                        |
| 30 | gi 4757756   | annexin A2 isoform 2                                                                         | 245 | 38808  | 8  | 17,1 | calcium-dependent phospholipid-binding protein                                                                         |
| 31 | gi 3916257   | FK506-binding protein                                                                        | 243 | 57583  | 11 | 13,7 | superfamily of calcium sensors and calcium signal modulator                                                            |
| 33 | gi 4505467   | 5'-nucleotidase isoform 1 preproprotein                                                      | 228 | 63898  | 8  | 12,9 | plasma membrane protein                                                                                                |
| 35 | gi 28336     | mutant beta-actin (beta'-actin)                                                              | 223 | 42128  | 10 | 20,3 |                                                                                                                        |
| 36 | gi 183008    | glucocerebrosidase precursor (5' end put.); putative                                         | 207 | 57798  | 7  | 9,3  |                                                                                                                        |
| 37 | gi 10716563  | calnexin precursor                                                                           | 189 | 67982  | 5  | 9    | ER                                                                                                                     |
| 40 | gi 4507677   | endoplasmin precursor                                                                        | 173 | 92696  | 6  | 5,5  | ER                                                                                                                     |
| 46 | gi 7657069   | ERO1-like protein alpha precursor                                                            | 126 | 55213  | 4  | 6,6  | favours disulfide bond formation in the ER                                                                             |
| 47 | gi 181184    | stomatin peptide                                                                             | 122 | 31860  | 3  | 12,5 | lipid raft-associated integral membrane protein                                                                        |
| 49 | gi 984145    | lanosterol synthase                                                                          | 113 | 67624  | 2  | 4,9  | catalyzes cyclization of (S)-2,3 oxidosqualene to lanosterol, reaction forms sterol nucleus, ER membrane; peripheral   |
| 53 | gi 35360     | PDC-E2 precursor (AA -54 to 561)                                                             | 102 | 65806  | 4  | 5,2  | dihydrolipoamide acetyltransferase, mitochondrial                                                                      |
| 56 | gi 15559516  | Acyl-CoA synthetase family member 2                                                          | 95  | 69035  | 2  | 4,2  | needed for fatty acid synthesis, in mitochondrial matrix                                                               |
| 69 | gi 37848     | unnamed protein product                                                                      | 69  | 14847  | 4  | 14,1 | vimentin, head sequence - associated with perilipin                                                                    |
| 70 | gi 809185    | Chain A, Metal Binding On The Structure Of Annexin V And Implications For Membrane Binding   | 68  | 35840  | 2  | 8,5  | Calcium PHOSPHOLIPID-Binding Protein                                                                                   |
| 71 | gi 15620821  | KIAA1881 protein                                                                             | 68  | 133891 | 2  | 1,8  | S3-12, lipid droplet-binding                                                                                           |
| 77 | gi 1373146   | CALM                                                                                         | 57  | 70879  | 2  | 4,9  | clathrin assembly protein                                                                                              |
| 85 | gi 34339     | LDL-receptor related precursor (AA -19 to 4525)                                              | 51  | 523119 | 4  | 0,4  | central role in mammalian cholesterol metabolism; the receptor protein mammalian cholesterol metabolism                |

#### A7

| Hit No. | Accession No. | Protein Description                                            | Score | Mass [Da] | Matches | Coverage [%] |                                                                                                |
|---------|---------------|----------------------------------------------------------------|-------|-----------|---------|--------------|------------------------------------------------------------------------------------------------|
| 1       | gi 62414289   | vimentin                                                       | 1608  | 53676     | 112     | 65,5         | intermediate filament - associated with perilipin                                              |
| 2       | gi 31542947   | 60 kDa heat shock protein, mitochondrial                       | 1495  | 61187     | 74      | 50,3         |                                                                                                |
| 3       | gi 220702506  | Chain A, TapasinERP57 HETERODIMER                              | 1385  | 54541     | 85      | 55,5         | protein disulfide isomerase, ER                                                                |
| 4       | gi 20070125   | protein disulfide-isomerase precursor                          | 1309  | 57480     | 91      | 61,2         |                                                                                                |
| 5       | gi 19263767   | Similar to cytoskeleton-associated protein 4, partial          | 1174  | 62194     | 42      | 53           |                                                                                                |
| 6       | gi 4757810    | ATP synthase subunit alpha, mitochondrial isoform a precursor  | 1120  | 59828     | 39      | 44,5         |                                                                                                |
| 11      | gi 5174735    | tubulin beta-4B chain                                          | 774   | 50255     | 43      | 38,7         |                                                                                                |
| 12      | gi 4507729    | tubulin beta-2A chain                                          | 681   | 50274     | 40      | 33,3         |                                                                                                |
| 13      | gi 35505      | pyruvate kinase                                                | 663   | 58411     | 24      | 36,2         |                                                                                                |
| 15      | gi 21361322   | tubulin beta-4A chain                                          | 618   | 50010     | 31      | 33,1         |                                                                                                |
| 18      | gi 4240305    | KIAA0908 protein                                               | 565   | 57134     | 24      | 29,1         |                                                                                                |
| 20      | gi 1297274    | beta-tubulin                                                   | 548   | 50941     | 31      | 22           |                                                                                                |
| 21      | gi 5453603    | T-complex protein 1 subunit beta isoform 1                     | 437   | 57794     | 11      | 24,1         | Chaperon, protein folding in an ATP-dependent manner                                           |
| 22      | gi 4557014    | catalase                                                       | 413   | 59947     | 14      | 26           |                                                                                                |
| 23      | gi 703093     | serine hydroxymethyltransferase, partial                       | 398   | 52828     | 10      | 17,3         |                                                                                                |
| 24      | gi 194388786  | unnamed protein product                                        | 373   | 41544     | 13      | 23,1         | highly similar to Polymerase I and transcript release factor                                   |
| 25      | gi 159162689  | Chain A, Human Protein Disulfide Isomerase, Nmr, 40 Structures | 361   | 13363     | 21      | 58,3         |                                                                                                |
| 27      | gi 23308577   | D-3-phosphoglycerate dehydrogenase                             | 320   | 57356     | 9       | 12,8         |                                                                                                |
| 28      | gi 13276641   | hypothetical protein                                           | 299   | 61919     | 7       | 12,7         | M28 Zn-Peptidase Nicalin                                                                       |
| 29      | gi 4757900    | calreticulin precursor                                         | 298   | 48283     | 20      | 24,2         | ER protein                                                                                     |
| 30      | gi 178390     | aldehyde dehydrogenase                                         | 292   | 56858     | 11      | 17,6         |                                                                                                |
| 31      | gi 4507813    | UDP-glucose 6-dehydrogenase isoform 1                          | 276   | 55674     | 9       | 15,2         |                                                                                                |
| 32      | gi 45827806   | atlastin-3                                                     | 273   | 60960     | 13      | 20,5         | dynamin-like GTPases involved in the generation of the tubular ER network                      |
| 33      | gi 10092665   | sushi domain-containing protein 2 precursor                    | 270   | 91746     | 9       | 10,3         | contains glycosyl-phosphatidyl-inositol-anchored membrane family domains                       |
| 34      | gi 1263008    | aldehyde dehydrogenase                                         | 267   | 57637     | 8       | 10,8         |                                                                                                |
| 36      | gi 1136741    | KIAA0002                                                       | 250   | 59035     | 7       | 10,8         | Chaperon, involved in protein folding                                                          |
| 39      | gi 433938     | ERGIC53                                                        | 241   | 57812     | 10      | 13,9         | membrane protein of the ER-Golgi intermediate compartment                                      |
| 40      | gi 1184537    | thioredoxin reductase                                          | 236   | 55126     | 9       | 14,1         |                                                                                                |
| 41      | gi 14017877   | KIAA1830 protein                                               | 235   | 55511     | 6       | 11,5         | TMX3, a thiol-disulfide oxidoreductase - disulfide bond formation in the endoplasmic reticulum |
| 42      | gi 793763     | membrane-type matrix metalloproteinase                         | 212   | 66183     | 7       | 10,1         |                                                                                                |
| 43      | gi 4758868    | prolyl 4-hydroxylase subunit alpha-2 isoform 1 precursor       | 196   | 61263     | 7       | 13,6         |                                                                                                |
| 44      | gi 28336      | mutant beta-actin (beta'-actin)                                | 189   | 42128     | 7       | 20           |                                                                                                |
| 50      | gi 4557303    | fatty aldehyde dehydrogenase isoform 2                         | 136   | 55269     | 5       | 8            | converts long-chain fatty aldehydes to the corresponding acids                                 |
| 58      | gi 3041771    | perilipin                                                      | 121   | 56201     | 3       | 7,3          | lipid droplet-binding                                                                          |
| 59      | gi 4507677    | endoplasmin precursor                                          | 117   | 92696     | 3       | 4,9          |                                                                                                |
| 68      | gi 4757756    | annexin A2 isoform 2                                           | 98    | 38808     | 4       | 9,7          | calcium-dependent phospholipid-binding protein                                                 |
| 75      | gi 181184     | stomatin peptide                                               | 86    | 31860     | 2       | 9,7          | lipid raft-associated integral membrane protein                                                |
| 81      | gi 1575347    | HU-K4                                                          | 70    | 49196     | 2       | 4,3          | phospholipase-D-like protein                                                                   |
| 91      | gi 181575     | dihydrolipoamide dehydrogenase precursor                       | 54    | 54812     | 1       | 2,8          | mitochondrial                                                                                  |

|    |             |                                         |    |       |   |     |                                                                                              |
|----|-------------|-----------------------------------------|----|-------|---|-----|----------------------------------------------------------------------------------------------|
| 94 | gi 13375618 | delta(24)-sterol reductase precursor    | 53 | 60803 | 3 | 3,1 | participates in the biosynthesis of steroids                                                 |
| 99 | gi 5454084  | serine palmitoyltransferase 1 isoform a | 44 | 53281 | 1 | 3   | involved in biosynthesis of sphingosine, precursor of many sphingolipids, anchored to the ER |

#### A8

| Hit No. | Accession No. | Protein Description                                                                | Score | Mass [Da] | Matches | Coverage [%] |                                                                                                                    |
|---------|---------------|------------------------------------------------------------------------------------|-------|-----------|---------|--------------|--------------------------------------------------------------------------------------------------------------------|
| 1       | gi 32189394   | ATP synthase subunit beta, mitochondrial precursor                                 | 1285  | 56525     | 86      | 63,1         |                                                                                                                    |
| 2       | gi 28940      | unnamed protein product                                                            | 1283  | 57976     | 87      | 62           |                                                                                                                    |
| 3       | gi 28940      | serpin H1 precursor                                                                | 1278  | 46525     | 85      | 57,7         | localizes to the endoplasmic reticulum, molecular chaperone                                                        |
| 4       | gi 4757810    | ATP synthase subunit alpha, mitochondrial isoform a precursor                      | 1266  | 59828     | 54      | 48,8         |                                                                                                                    |
| 5       | gi 1710248    | protein disulfide isomerase-related protein 5                                      | 929   | 46512     | 39      | 44,4         |                                                                                                                    |
| 6       | gi 340219     | vimentin                                                                           | 831   | 53738     | 32      | 41,6         | intermediate filament - associated with perilipin                                                                  |
| 7       | gi 537526     | microsomal epoxide hydrolase                                                       | 799   | 53136     | 44      | 37,6         |                                                                                                                    |
| 8       | gi 4503571    | alpha-enolase isoform 1                                                            | 758   | 47481     | 27      | 52,5         | conversion of 2-phosphoglycerate (2-PG) to phosphoenolpyruvate (PEP), the ninth and penultimate step of glycolysis |
| 9       | gi 4929557    | CGI-44 protein                                                                     | 626   | 50202     | 18      | 31,1         |                                                                                                                    |
| 10      | gi 4504327    | trifunctional enzyme subunit beta, mitochondrial precursor                         | 598   | 51547     | 21      | 25,1         | thioredoxin reductase                                                                                              |
| 12      | gi 473947     | KIAA0115                                                                           | 517   | 50851     | 17      | 25,4         |                                                                                                                    |
| 15      | gi 860986     | protein disulfide isomerase                                                        | 513   | 57043     | 22      | 36,6         |                                                                                                                    |
| 18      | gi 31092      | unnamed protein product                                                            | 480   | 50437     | 29      | 24,2         | elongation factor                                                                                                  |
| 19      | gi 9836652    | BSCv                                                                               | 461   | 47887     | 22      | 31,2         | adipocyte plasma membrane-associated protein                                                                       |
| 20      | gi 5821140    | ASY                                                                                | 404   | 40422     | 21      | 24,4         |                                                                                                                    |
| 21      | gi 4501885    | actin, cytoplasmic 1                                                               | 380   | 42052     | 15      | 32           |                                                                                                                    |
| 22      | gi 4885281    | glutamate dehydrogenase 1, mitochondrial precursor                                 | 380   | 61701     | 14      | 19,7         |                                                                                                                    |
| 23      | gi 20067392   | thioredoxin related protein                                                        | 358   | 41361     | 22      | 26,7         |                                                                                                                    |
| 25      | gi 35655      | unnamed protein product                                                            | 347   | 57458     | 14      | 23,8         |                                                                                                                    |
| 26      | gi 6470150    | BiP protein, partial                                                               | 342   | 71002     | 9       | 16,7         | autoantigen associated with rheumatoid arthritis                                                                   |
| 27      | gi 18379349   | synaptic vesicle membrane protein VAT-1 homolog                                    | 340   | 42122     | 15      | 24,7         | abundant integral membrane protein, role of phospholipase D in the transport of VAT1 to plasma membranes           |
| 29      | gi 499719     | mitochondrial dihydrolipoamide succinyltransferase                                 | 307   | 49000     | 10      | 14,1         |                                                                                                                    |
| 30      | gi 4503481    | elongation factor 1-gamma                                                          | 290   | 50429     | 11      | 16,9         |                                                                                                                    |
| 31      | gi 24233517   | inhibitor of nuclear factor kappa-B kinase-interacting protein isoform 1           | 289   | 43228     | 10      | 16,2         |                                                                                                                    |
| 32      | gi 37492      | alpha-tubulin                                                                      | 282   | 50810     | 10      | 22,2         |                                                                                                                    |
| 33      | gi 40068518   | 6-phosphogluconate dehydrogenase, decarboxylating                                  | 256   | 53619     | 8       | 14,3         |                                                                                                                    |
| 35      | gi 5453601    | cartilage-associated protein precursor                                             | 246   | 47159     | 11      | 13,2         |                                                                                                                    |
| 38      | gi 3043670    | KIAA0573 protein                                                                   | 177   | 52282     | 7       | 7,5          | ER protein, thioredoxin domains                                                                                    |
| 39      | gi 515634     | ubiquinol-cytochrome c reductase core l protein                                    | 175   | 53270     | 5       | 10,8         |                                                                                                                    |
| 40      | gi 4503529    | eukaryotic initiation factor 4A-I isoform 1                                        | 169   | 46353     | 8       | 14,8         |                                                                                                                    |
| 41      | gi 19743875   | fumarate hydratase, mitochondrial                                                  | 165   | 54773     | 5       | 10,8         |                                                                                                                    |
| 42      | gi 409027     | CDC42 GTPase-activating protein, partial                                           | 148   | 52966     | 5       | 10,4         | Sec14p-like lipid-binding domain, phospholipid binding pocket                                                      |
| 43      | gi 4502679    | CD63 antigen isoform A                                                             | 145   | 26474     | 8       | 7,6          | tetraspan family                                                                                                   |
| 44      | gi 4507677    | endoplasmic precursor                                                              | 140   | 92696     | 3       | 4,2          | ER protein                                                                                                         |
| 45      | gi 4757900    | calreticulin precursor                                                             | 121   | 48283     | 5       | 17,3         | ER protein                                                                                                         |
| 46      | gi 4506675    | dolichyl-diphosphooligosaccharide--protein glycosyltransferase subunit 1 precursor | 111   | 68641     | 4       | 5,8          | sugar transfer from dolichol-phosphate-sugars occurs exclusively on the luminal side of the ER                     |
| 47      | gi 4757756    | annexin A2 isoform 2                                                               | 111   | 38808     | 3       | 12,7         | calcium-dependent phospholipid-binding protein                                                                     |
| 48      | gi 181184     | stomatin peptide                                                                   | 109   | 31860     | 4       | 10,8         | lipid raft-associated integral membrane protein                                                                    |
| 50      | gi 40254986   | hydroxysteroid dehydrogenase-like protein 2 isoform 1                              | 101   | 45651     | 4       | 6,7          |                                                                                                                    |
| 51      | gi 3041771    | perilipin                                                                          | 95    | 56201     | 3       | 4,6          | lipid droplet-binding                                                                                              |
| 55      | gi 4557303    | fatty aldehyde dehydrogenase isoform 2                                             | 86    | 55269     | 2       | 5,2          | converts long-chain fatty aldehydes to the corresponding acids                                                     |
| 67      | gi 3095186    | cargo selection protein TIP47                                                      | 64    | 47175     | 2       | 3,9          | lipid droplet-binding                                                                                              |

#### A9

| Hit No. | Accession No. | Protein Description                                        | Score | Mass [Da] | Matches | Coverage [%] |                                                                                                            |
|---------|---------------|------------------------------------------------------------|-------|-----------|---------|--------------|------------------------------------------------------------------------------------------------------------|
| 1       | gi 4501885    | actin, cytoplasmic 1                                       | 1367  | 42052     | 160     | 61,1         |                                                                                                            |
| 2       | gi 4757756    | annexin A2 isoform 2                                       | 1285  | 38808     | 81      | 61,7         | calcium-dependent phospholipid-binding protein                                                             |
| 3       | gi 4501881    | actin, alpha skeletal muscle                               | 941   | 42366     | 105     | 44,3         |                                                                                                            |
| 7       | gi 340219     | vimentin                                                   | 711   | 53738     | 21      | 33,9         | intermediate filament - associated with perilipin                                                          |
| 8       | gi 31645      | glyceraldehyde-3-phosphate dehydrogenase                   | 667   | 36202     | 59      | 39,7         |                                                                                                            |
| 9       | gi 2906146    | malate dehydrogenase precursor                             | 608   | 35965     | 24      | 40,8         |                                                                                                            |
| 12      | gi 4503327    | NADH-cytochrome b5 reductase 3 isoform 1                   | 562   | 34441     | 27      | 40,5         | cytoplasmic side of ER, functions in desaturation and elongation of fatty acids & cholesterol biosynthesis |
| 13      | gi 704416     | elongation factor Tu                                       | 525   | 49851     | 17      | 32,1         |                                                                                                            |
| 14      | gi 4504505    | peroxisomal multifunctional enzyme type 2 isoform 2        | 502   | 80092     | 14      | 20,1         | peroxisomal beta-oxidation pathway for fatty acids                                                         |
| 15      | gi 4502101    | annexin A1                                                 | 478   | 38918     | 15      | 29,8         | calcium-dependent phospholipid-binding protein                                                             |
| 16      | gi 5031857    | L-lactate dehydrogenase A chain isoform 1                  | 448   | 36950     | 13      | 31,9         |                                                                                                            |
| 17      | gi 5453543    | aldo-keto reductase family 1 member C1                     | 440   | 37221     | 14      | 37,8         | conversion of aldehydes and ketones to their corresponding alcohols                                        |
| 19      | gi 4557032    | L-lactate dehydrogenase B chain                            | 399   | 36900     | 12      | 28,7         |                                                                                                            |
| 20      | gi 509676     | mitochondrial 3-oxoacyl-CoA thiolase                       | 383   | 42469     | 13      | 33,8         |                                                                                                            |
| 21      | gi 35655      | unnamed protein product                                    | 381   | 57458     | 15      | 22,4         | protein disulfide isomerase (PDla) family, ER, proteins involved in oxidative protein folding              |
| 22      | gi 50592988   | cytochrome b-c1 complex subunit 2, mitochondrial precursor | 365   | 48584     | 12      | 28,3         |                                                                                                            |
| 23      | gi 4506667    | 60S acidic ribosomal protein P0                            | 351   | 34423     | 10      | 28,4         |                                                                                                            |
| 25      | gi 1698401    | Vat1                                                       | 343   | 32651     | 11      | 24           | vesicle amine transport protein                                                                            |
| 26      | gi 860986     | protein disulfide isomerase                                | 330   | 57043     | 8       | 14,9         |                                                                                                            |
| 28      | gi 31092      | unnamed protein product                                    | 312   | 50437     | 14      | 19,5         | elongation factor                                                                                          |

|    |             |                                                             |     |       |    |      |                                                                                                              |
|----|-------------|-------------------------------------------------------------|-----|-------|----|------|--------------------------------------------------------------------------------------------------------------|
| 29 | gi 386758   | GRP78 precursor, partial                                    | 312 | 72185 | 7  | 14,5 | glucose-regulated protein                                                                                    |
| 30 | gi 12053327 | hypothetical protein                                        | 309 | 44860 | 12 | 33,5 | transmembrane protein 43 (LUMA)                                                                              |
| 32 | gi 6005721  | erlin-2 isoform 1                                           | 278 | 38044 | 7  | 16,8 | localized to lipid rafts of the endoplasmic reticulum                                                        |
| 33 | gi 3288815  | citrate synthase                                            | 267 | 51959 | 9  | 14,8 |                                                                                                              |
| 34 | gi 5821140  | ASY                                                         | 256 | 40422 | 11 | 17,4 |                                                                                                              |
| 35 | gi 793763   | membrane-type matrix metalloproteinase                      | 254 | 66183 | 9  | 10,1 |                                                                                                              |
| 36 | gi 28626510 | reticulocalbin-3 precursor                                  | 249 | 37470 | 9  | 15,5 | calcium-binding protein                                                                                      |
| 37 | gi 62898103 | aspartate aminotransferase 2 precursor variant              | 246 | 47916 | 5  | 14   |                                                                                                              |
| 38 | gi 4505763  | phosphoglycerate kinase 1                                   | 242 | 44985 | 9  | 21,3 | catalyzes the conversion of 1,3-diphosphoglycerate to 3-phosphoglycerate                                     |
| 39 | gi 2337920  | syntaxin 7                                                  | 240 | 29941 | 4  | 21,5 | proteins implicated in the docking of synaptic vesicles with the presynaptic plasma membrane                 |
| 40 | gi 4503143  | cathepsin D preproprotein                                   | 233 | 45037 | 10 | 16,7 | protease                                                                                                     |
| 42 | gi 28178832 | isocitrate dehydrogenase [NADP], mitochondrial precursor    | 225 | 51333 | 6  | 14,8 |                                                                                                              |
| 44 | gi 499158   | mitochondrial acetoacetyl-CoA thiolase                      | 224 | 45537 | 11 | 16,2 | catalyzation of the reversible thiolitic cleavage of 3-ketoacyl-CoA into acyl-CoA and acetyl-CoA             |
| 50 | gi 181184   | stomatin peptide                                            | 210 | 31860 | 5  | 19,1 | lipid raft-associated integral membrane protein                                                              |
| 55 | gi 10716563 | calnexin precursor                                          | 177 | 67982 | 6  | 8,4  | ER protein                                                                                                   |
| 57 | gi 8393516  | sterol-4-alpha-carboxylate 3-dehydrogenase, decarboxylating | 173 | 42159 | 5  | 11,5 | protein is localized in ER and is involved in cholesterol biosynthesis                                       |
| 68 | gi 5031765  | corticosteroid 11-beta-dehydrogenase isozyme 1              | 136 | 32608 | 4  | 13   | catalyzes the conversion of the stress hormone cortisol to the inactive metabolite cortisone (and reverse) * |
| 72 | gi 1743867  | acid ceramidase                                             | 131 | 45077 | 5  | 7,8  | catalyzes the hydrolysis of ceramide into sphingosine and free fatty acid                                    |
| 89 | gi 546518   | stearoyl-CoA desaturase                                     | 96  | 27713 | 2  | 8    | key enzyme in fatty acid metabolism, responsible for forming a double bond in stearoyl-CoA                   |

\* Too much cortisol can lead to central obesity.

#### A10

| Hit No. | Accession No. | Protein Description                                                                         | Score | Mass [Da] | Matches | Coverage [%] |                                                                                                                                  |
|---------|---------------|---------------------------------------------------------------------------------------------|-------|-----------|---------|--------------|----------------------------------------------------------------------------------------------------------------------------------|
| 1       | gi 4757756    | annexin A2 isoform 2                                                                        | 1001  | 38808     | 61      | 55,5         | calcium-dependent phospholipid-binding protein                                                                                   |
| 2       | gi 181184     | stomatin peptide                                                                            | 910   | 31860     | 63      | 46,9         | lipid raft-associated integral membrane protein                                                                                  |
| 6       | gi 4501885    | actin, cytoplasmic 1                                                                        | 690   | 42052     | 45      | 42,9         |                                                                                                                                  |
| 7       | gi 4503327    | NADH-cytochrome b5 reductase 3 isoform 1                                                    | 690   | 34441     | 60      | 40,5         | membrane-bound cytoplasmic ER side, functions in desaturation & elongation of fatty acids, in cholesterol biosynthesis           |
| 8       | gi 119609105  | prohibitin 2                                                                                | 688   | 32262     | 24      | 50,2         | lipid raft-associated integral membrane protein                                                                                  |
| 10      | gi 238427     | Porin 31HM [human, skeletal muscle membranes, Peptide, 282 aa]                              | 626   | 30737     | 32      | 53,9         | beta barrel proteins that cross a cellular membrane and act as a pore through which molecules can diffuse                        |
| 11      | gi 4505773    | prohibitin                                                                                  | 568   | 29843     | 21      | 42,3         | lipid raft-associated integral membrane protein                                                                                  |
| 12      | gi 15928608   | Solute carrier family 25 (mitochondrial carrier; adenine nucleotide translocator), member 6 | 505   | 33133     | 22      | 34,2         |                                                                                                                                  |
| 13      | gi 45829841   | SLC25A5 protein, partial                                                                    | 491   | 35499     | 23      | 28,5         | ADP/ATP transporter, mitochondrial carrier                                                                                       |
| 14      | gi 4503143    | cathepsin D preproprotein                                                                   | 466   | 45037     | 27      | 23,3         | protease, most of the family members become activated at the low pH found lysosomes                                              |
| 15      | gi 2906146    | malate dehydrogenase precursor                                                              | 464   | 35965     | 19      | 29,9         |                                                                                                                                  |
| 16      | gi 7705855    | estradiol 17-beta-dehydrogenase 12                                                          | 448   | 34416     | 20      | 26,9         | enzyme converts estrone into estradiol in ovarian tissue - also involved in fatty acid elongation                                |
| 17      | gi 190200     | porin, partial                                                                              | 394   | 38639     | 15      | 28,8         | beta barrel proteins that cross a cellular membrane and act as a pore through which molecules can diffuse                        |
| 18      | gi 38649415   | Signal recognition particle receptor, B subunit                                             | 390   | 29926     | 10      | 29,9         | protein targeting to the membrane of the ER                                                                                      |
| 19      | gi 5803013    | endoplasmic reticulum resident protein 29 isoform 1 precursor                               | 376   | 29032     | 16      | 28,4         | ER protein                                                                                                                       |
| 20      | gi 5031857    | L-lactate dehydrogenase A chain isoform 1                                                   | 364   | 36950     | 12      | 25,9         |                                                                                                                                  |
| 22      | gi 28940      | unnamed protein product                                                                     | 311   | 57976     | 9       | 17,4         | ATP synthase, mitochondrial                                                                                                      |
| 24      | gi 35903      | ribosomal protein L7                                                                        | 287   | 29221     | 14      | 30,6         |                                                                                                                                  |
| 26      | gi 15680023   | B-cell receptor-associated protein 31                                                       | 280   | 28032     | 15      | 22           |                                                                                                                                  |
| 27      | gi 16877071   | ATP synthase, H+ transporting, mitochondrial F1 complex, gamma polypeptide 1                | 279   | 33002     | 9       | 22,5         |                                                                                                                                  |
| 29      | gi 4885079    | ATP synthase subunit gamma, mitochondrial isoform H (heart) precursor                       | 259   | 32917     | 9       | 22,2         |                                                                                                                                  |
| 31      | gi 5803225    | 14-3-3 protein epsilon                                                                      | 251   | 29326     | 9       | 21,2         | mediation of signal transduction by binding phosphoserine-containing proteins, activities e.g. regulation of insulin sensitivity |
| 32      | gi 189617     | protein PP4-X                                                                               | 246   | 36262     | 7       | 13,4         | member of the phospholipase A2 inhibitor group, annexin domains                                                                  |
| 33      | gi 25188179   | voltage-dependent anion-selective channel protein 3 isoform 1                               | 244   | 30981     | 9       | 14,1         | beta barrel proteins that cross a cellular membrane and act as a pore through which molecules can diffuse                        |
| 34      | gi 306785     | G protein beta subunit                                                                      | 242   | 38061     | 13      | 17,6         | pre-mRNA processing and cytoskeleton assembly                                                                                    |
| 37      | gi 4502013    | adenylate kinase 2, mitochondrial isoform a                                                 | 231   | 26689     | 8       | 27,6         |                                                                                                                                  |
| 38      | gi 950004     | citrate transporter protein                                                                 | 225   | 34405     | 11      | 16,4         |                                                                                                                                  |
| 39      | gi 4507953    | 14-3-3 protein zeta/delta                                                                   | 221   | 27899     | 11      | 18           | mediation of signal transduction by binding phosphoserine-containing proteins, activities e.g. regulation of insulin sensitivity |
| 42      | gi 31645      | glyceraldehyde-3-phosphate dehydrogenase                                                    | 220   | 36202     | 9       | 24,8         |                                                                                                                                  |
| 44      | gi 4240305    | KIAA0908 protein                                                                            | 215   | 57134     | 9       | 13           | prenylcysteine lyase, oxidoreductase, specifically acting on a sulfur group                                                      |
| 45      | gi 6470150    | BiP protein, partial                                                                        | 209   | 71002     | 6       | 11,4         | glucose-regulated protein (grp78), ER chaperonin                                                                                 |
| 49      | gi 9622124    | androgen-regulated short-chain dehydrogenase/reductase 1                                    | 204   | 35791     | 4       | 17,6         |                                                                                                                                  |
| 57      | gi 1575000    | 2,4-dienoyl-CoA reductase                                                                   | 173   | 36096     | 7       | 15,8         | enzyme which participates in the beta oxidation and metabolism of unsaturated fatty enoyl-CoA esters                             |
| 58      | gi 35655      | unnamed protein product                                                                     | 170   | 57458     | 6       | 10,8         | protein disulfide isomerase (PDIa), involved in oxidative protein folding in the ER                                              |
| 59      | gi 178849     | apolipoprotein E                                                                            | 168   | 36302     | 6       | 10,4         | transports lipoproteins, fat-soluble vitamins, and cholesterol- normally in chylomicrons                                         |
| 66      | gi 6330243    | KIAA1181 protein                                                                            | 147   | 37312     | 5       | 10,7         | endoplasmic reticulum-Golgi intermediate compartment (ERGIC)                                                                     |
| 67      | gi 16924265   | Enoyl Coenzyme A hydratase 1, peroxisomal                                                   | 143   | 36078     | 2       | 9,5          | enzyme hydrates the double bond between second and third carbons on acyl-CoA, essential to metabolizing FAs                      |
| 68      | gi 2078327    | 3-hydroxyacyl-CoA dehydrogenase, partial                                                    | 143   | 33608     | 8       | 11,7         | participates in fatty acid elongation and fatty acid metabolism                                                                  |
| 69      | gi 4502101    | annexin A1                                                                                  | 142   | 38918     | 6       | 11           | calcium-dependent phospholipid-binding protein                                                                                   |
| 83      | gi 15826034   | Chain A, Apolipoprotein E3 22kd Fragment Lys146Gln Mutant                                   | 118   | 22174     | 5       | 17,3         | lipid binding protein                                                                                                            |
| 96      | gi 2258418    | dolichol monophosphate mannose synthase                                                     | 96    | 28857     | 3       | 13           | sugar transfer from dolichol-phosphate-sugars occurs exclusively on the luminal side of the ER                                   |
| 103     | gi 5031765    | corticosteroid 11-beta-dehydrogenase isozyme 1                                              | 84    | 32608     | 4       | 7,2          | catalyzes the conversion of the stress hormone cortisol to the inactive metabolite cortisone (and reverse) *                     |
| 116     | gi 179832     | calnexin                                                                                    | 67    | 67948     | 1       | 2,7          | ER protein                                                                                                                       |
| 120     | gi 546518     | stearoyl-CoA desaturase                                                                     | 62    | 27713     | 2       | 8            | key enzyme in fatty acid metabolism, responsible for forming a double bond in stearoyl-CoA                                       |

#### A11

| Hit No. | Accession No. | Protein Description | Score | Mass [Da] | Matches | Coverage [%] |
|---------|---------------|---------------------|-------|-----------|---------|--------------|
|---------|---------------|---------------------|-------|-----------|---------|--------------|

|     |              |                                                                                     |     |        |    |      |                                                    |
|-----|--------------|-------------------------------------------------------------------------------------|-----|--------|----|------|----------------------------------------------------|
| 3   | gi 34147513  | ras-related protein Rab-7a                                                          | 700 | 23760  | 35 | 69,1 |                                                    |
| 6   | gi 350476    | protein NIG58,Bence-Jones                                                           | 566 | 23061  | 76 | 36,7 |                                                    |
| 7   | gi 13569962  | ras-related protein Rab-1B                                                          | 548 | 22328  | 40 | 61,7 |                                                    |
| 8   | gi 351205    | protein NIG64 lambda,Bence-Jones                                                    | 546 | 22946  | 66 | 36,6 |                                                    |
| 9   | gi 4501885   | actin, cytoplasmic 1                                                                | 532 | 42052  | 29 | 40   |                                                    |
| 11  | gi 508285    | Rab5c-like protein                                                                  | 523 | 23781  | 22 | 51,4 |                                                    |
| 14  | gi 550062    | GTP-binding protein                                                                 | 459 | 23720  | 14 | 44,3 |                                                    |
| 15  | gi 4504517   | heat shock protein beta-1                                                           | 455 | 22826  | 20 | 43,4 |                                                    |
| 19  | gi 148596959 | redox-regulatory protein FAM213A isoform 1 precursor                                | 380 | 25861  | 19 | 31,4 |                                                    |
| 20  | gi 4505591   | peroxiredoxin-1                                                                     | 368 | 22324  | 15 | 31,2 |                                                    |
| 21  | gi 4502303   | ATP synthase subunit O, mitochondrial precursor                                     | 358 | 23377  | 15 | 35,2 |                                                    |
| 22  | gi 19923231  | ras-related protein Rab-6A isoform a                                                | 356 | 23648  | 15 | 39,4 |                                                    |
| 23  | gi 19923262  | ras-related protein Rab-5A                                                          | 343 | 23872  | 11 | 34   |                                                    |
| 24  | gi 20147741  | Ras family small GTP binding protein TC21                                           | 336 | 23508  | 11 | 34,5 |                                                    |
| 25  | gi 15451856  | caveolin-1 isoform alpha                                                            | 335 | 20630  | 18 | 43,8 | involved in endocytosis                            |
| 26  | gi 37138     | unnamed protein product                                                             | 328 | 133321 | 8  | 6,6  |                                                    |
| 27  | gi 5453549   | peroxiredoxin-4 precursor                                                           | 323 | 30749  | 15 | 28,8 |                                                    |
| 29  | gi 181184    | stomatin peptide                                                                    | 317 | 31860  | 6  | 20,1 | lipid raft-associated integral membrane protein    |
| 30  | gi 6647832   | Membrane-associated progesterone receptor component 2; Steroid receptor protein DG6 | 315 | 23861  | 12 | 25,1 |                                                    |
| 31  | gi 425518    | anti-colorectal carcinoma heavy chain                                               | 314 | 51254  | 32 | 12   |                                                    |
| 32  | gi 2852648   | unknown                                                                             | 312 | 22435  | 15 | 39,7 |                                                    |
| 33  | gi 10880989  | ras-related protein Rab-18 isoform 1                                                | 302 | 23248  | 8  | 36,4 | lipid droplet-binding                              |
| 35  | gi 4506371   | ras-related protein Rab-5B isoform 1                                                | 295 | 23920  | 10 | 34   |                                                    |
| 36  | gi 7643782   | HDCMD47P                                                                            | 294 | 25683  | 12 | 25,2 |                                                    |
| 37  | gi 136066    | Triosephosphate isomerase; Short=TIM; Triose-phosphate isomerase                    | 290 | 26894  | 9  | 29,4 |                                                    |
| 38  | gi 793763    | membrane-type matrix metalloproteinase                                              | 288 | 66183  | 18 | 12,9 |                                                    |
| 41  | gi 763130    | YPT3                                                                                | 274 | 24673  | 10 | 24,3 |                                                    |
| 42  | gi 4757756   | annexin A2 isoform 2                                                                | 272 | 38808  | 8  | 23,9 | calcium-dependent phospholipid-binding protein     |
| 43  | gi 1922287   | enoyl-CoA hydratase                                                                 | 269 | 31807  | 10 | 26,6 |                                                    |
| 44  | gi 5454028   | ras-related protein R-Ras precursor                                                 | 267 | 23637  | 9  | 23,4 |                                                    |
| 45  | gi 5729875   | membrane-associated progesterone receptor component 1                               | 260 | 21772  | 16 | 24,1 |                                                    |
| 46  | gi 19923437  | GTP:AMP phosphotransferase, mitochondrial isoform a                                 | 253 | 25550  | 10 | 30,4 |                                                    |
| 47  | gi 7661678   | ras-related protein Rap-1b isoform 1 precursor                                      | 245 | 21040  | 12 | 28,8 |                                                    |
| 48  | gi 34709     | manganese superoxide dismutase (MnSOD)                                              | 224 | 24891  | 9  | 20,3 |                                                    |
| 49  | gi 5802974   | thioredoxin-dependent peroxide reductase, mitochondrial isoform a precursor         | 224 | 28017  | 11 | 14,5 |                                                    |
| 52  | gi 7706563   | ras-related protein Rab-8B                                                          | 212 | 23740  | 13 | 18,4 |                                                    |
| 53  | gi 234746    | RAS-related protein MEL                                                             | 206 | 23753  | 13 | 18,4 |                                                    |
| 54  | gi 4758504   | 3-hydroxyacyl-CoA dehydrogenase type-2 isoform 1                                    | 200 | 27134  | 7  | 28,4 |                                                    |
| 75  | gi 4757900   | calreticulin precursor                                                              | 133 | 48283  | 5  | 9,8  | ER                                                 |
| 82  | gi 340219    | vimentin                                                                            | 114 | 53738  | 2  | 5,2  | intermediate filament - associated with periliipin |
| 112 | gi 458119    | acyl-CoA oxidase                                                                    | 62  | 74910  | 1  | 2    |                                                    |

## A12

| Hit No. | Accession No. | Protein Description                                                                 | Score | Mass [Da] | Matches | Coverage [%] |                                                 |
|---------|---------------|-------------------------------------------------------------------------------------|-------|-----------|---------|--------------|-------------------------------------------------|
| 4       | gi 181250     | cyclophilin, partial                                                                | 830   | 22654     | 60      | 69,6         |                                                 |
| 6       | gi 28317      | unnamed protein product                                                             | 506   | 59720     | 23      | 21,6         |                                                 |
| 8       | gi 177870     | alpha-2-macroglobulin precursor                                                     | 311   | 164600    | 30      | 2,5          |                                                 |
| 9       | gi 2852648    | unknown                                                                             | 296   | 22435     | 9       | 36,1         |                                                 |
| 10      | gi 4757756    | annexin A2 isoform 2                                                                | 288   | 38808     | 12      | 18           | calcium-dependent phospholipid-binding protein  |
| 11      | gi 6647832    | Membrane-associated progesterone receptor component 2; Steroid receptor protein DG6 | 284   | 23861     | 8       | 22,4         |                                                 |
| 12      | gi 15451856   | caveolin-1 isoform alpha                                                            | 283   | 20630     | 13      | 47,8         | involved in endocytosis                         |
| 14      | gi 9945306    | microsomal glutathione S-transferase 1 isoform a                                    | 262   | 17644     | 13      | 31           |                                                 |
| 15      | gi 182516     | ferritin light subunit, partial                                                     | 258   | 16441     | 15      | 44,1         |                                                 |
| 16      | gi 28375485   | unnamed protein product                                                             | 252   | 25790     | 13      | 24           |                                                 |
| 17      | gi 28336      | mutant beta-actin (beta'-actin)                                                     | 247   | 42128     | 11      | 18,1         |                                                 |
| 19      | gi 425518     | anti-colorectal carcinoma heavy chain                                               | 224   | 51254     | 8       | 12           |                                                 |
| 20      | gi 5454090    | translocon-associated protein subunit delta isoform 2 precursor                     | 222   | 19158     | 12      | 28,3         |                                                 |
| 21      | gi 4506691    | 40S ribosomal protein S16                                                           | 222   | 16549     | 7       | 32,2         |                                                 |
| 22      | gi 4506685    | 40S ribosomal protein S13                                                           | 216   | 17212     | 9       | 35,1         |                                                 |
| 23      | gi 4506597    | 60S ribosomal protein L12                                                           | 215   | 17979     | 6       | 33,3         |                                                 |
| 24      | gi 4502205    | ADP-ribosylation factor 4                                                           | 215   | 20612     | 9       | 27,2         |                                                 |
| 25      | gi 5031635    | cofilin-1                                                                           | 214   | 18719     | 10      | 42,2         |                                                 |
| 27      | gi 4758714    | microsomal glutathione S-transferase 3                                              | 211   | 16734     | 7       | 18,4         |                                                 |
| 56      | gi 181184     | stomatin peptide                                                                    | 118   | 31860     | 4       | 11,1         | lipid raft-associated integral membrane protein |
| 65      | gi 303618     | phospholipase C-alpha                                                               | 110   | 57065     | 3       | 6,3          |                                                 |
| 95      | gi 179832     | calnexin                                                                            | 69    | 67948     | 1       | 2,7          |                                                 |
| 107     | gi 4505893    | proteolipid protein 2                                                               | 58    | 17022     | 2       | 8,6          |                                                 |
| 123     | gi 5729875    | membrane-associated progesterone receptor component 1                               | 44    | 21772     | 1       | 7,2          |                                                 |

A13

| Hit No. | Accession No. | Protein Description                              | Score | Mass [Da] | Matches | Coverage [%] |                                                 |
|---------|---------------|--------------------------------------------------|-------|-----------|---------|--------------|-------------------------------------------------|
| 4       | gi 28317      | unnamed protein product                          | 345   | 59720     | 14      | 15,3         |                                                 |
| 6       | gi 9945306    | microsomal glutathione S-transferase 1 isoform a | 223   | 17644     | 28      | 31           |                                                 |
| 10      | gi 303618     | phospholipase C-alpha                            | 152   | 57065     | 7       | 12,5         |                                                 |
| 21      | gi 4757756    | annexin A2 isoform 2                             | 93    | 38808     | 5       | 10           | calcium-dependent phospholipid-binding protein  |
| 29      | gi 181184     | stomatin peptide                                 | 68    | 31860     | 2       | 6,9          | lipid raft-associated integral membrane protein |

## Table S2b

**IP : Poietics AIM**

VIM 3B4

| Hit No. | Accession No.   | Protein Description                                                                    | Score | Mass [Da] | Matches | Coverage [%] |                                                                                                                 |
|---------|-----------------|----------------------------------------------------------------------------------------|-------|-----------|---------|--------------|-----------------------------------------------------------------------------------------------------------------|
|         | 8 gi 4972627    | caveolin 1                                                                             | 66    | 13237     | 2       | 18,6         | involved in endocytosis                                                                                         |
| B2      |                 |                                                                                        |       |           |         |              |                                                                                                                 |
| Hit No. | Accession No.   | Protein Description                                                                    | Score | Mass [Da] | Matches | Coverage [%] |                                                                                                                 |
|         | 8 gi 61743954   | neuroblast differentiation-associated protein AHNAK isoform 1                          | 837   | 629213    | 40      | 5,6          | AHNAK binds annexin and works together in the developement of intracellular membranes                           |
|         | 17 gi 15620821  | KIAA1881 protein                                                                       | 121   | 133891    | 3       | 2,9          | S3-12, lipid droplet-binding                                                                                    |
|         | 18 gi 34339     | LDL-receptor related precursor (AA -19 to 4525)                                        | 118   | 523119    | 5       | 0,9          | plays a central role in mammalian cholesterol metabolism                                                        |
|         | 27 gi 915392    | fatty acid synthase                                                                    | 83    | 275542    | 3       | 1,3          | multi enzyme, catalyses synthesis of palmitate from acetyl-CoA & malonyl-CoA to long-chain saturated fatty acid |
|         | 30 gi 181184    | stomatin peptide                                                                       | 73    | 31860     | 2       | 5,2          | lipid raft-associated integral membrane protein                                                                 |
|         | 32 gi 4757756   | annexin A2 isoform 2                                                                   | 71    | 38808     | 2       | 6,8          | calcium-dependent phospholipid-binding protein                                                                  |
| B3      |                 |                                                                                        |       |           |         |              |                                                                                                                 |
| Hit No. | Accession No.   | Protein Description                                                                    | Score | Mass [Da] | Matches | Coverage [%] |                                                                                                                 |
|         | 2 gi 61743954   | neuroblast differentiation-associated protein AHNAK isoform 1                          | 688   | 629213    | 27      | 4,8          | AHNAK binds annexin and works together in the developement of intracellular membranes                           |
|         | 5 gi 68533031   | FASN variant protein                                                                   | 608   | 279819    | 16      | 5,5          | polymerize simple fatty acids into a large variety of different products, fatty acid synthase                   |
|         | 7 gi 7305053    | myoferlin isoform a                                                                    | 532   | 236100    | 19      | 7,6          | calcium/phospholipid-binding protein                                                                            |
|         | 11 gi 15620821  | KIAA1881 protein                                                                       | 300   | 133891    | 7       | 6,2          | S3-12, lipid droplet-binding                                                                                    |
|         | 16 gi 34339     | LDL-receptor related precursor (AA -19 to 4525)                                        | 225   | 523119    | 7       | 1,6          | plays a central role in mammalian cholesterol metabolism                                                        |
|         | 19 gi 35655     | unnamed protein product                                                                | 152   | 57458     | 6       | 11           | disulfide isomerase, involved in oxidative protein folding in the ER                                            |
|         | 24 gi 4757756   | annexin A2 isoform 2                                                                   | 110   | 38808     | 4       | 6,8          | calcium-dependent phospholipid-binding protein                                                                  |
|         | 30 gi 181184    | stomatin peptide                                                                       | 81    | 31860     | 2       | 6,9          | lipid raft-associated integral membrane protein                                                                 |
|         | 34 gi 4758012   | clathrin heavy chain 1                                                                 | 58    | 193260    | 2       | 1,4          | involved in endocytosis                                                                                         |
| B4      |                 |                                                                                        |       |           |         |              |                                                                                                                 |
| Hit No. | Accession No.   | Protein Description                                                                    | Score | Mass [Da] | Matches | Coverage [%] |                                                                                                                 |
|         | 12 gi 68533031  | FASN variant protein                                                                   | 272   | 279819    | 7       | 2,6          | polymerize simple fatty acids into a large variety of different products, fatty acid synthase                   |
|         | 16 gi 4757756   | annexin A2 isoform 2                                                                   | 245   | 38808     | 8       | 18,6         | calcium-dependent phospholipid-binding protein                                                                  |
|         | 21 gi 5453832   | hypoxia up-regulated protein 1 precursor                                               | 185   | 111494    | 10      | 7,8          | endoplasmic reticulum (ER) under hypoxic conditions                                                             |
|         | 33 gi 34339     | LDL-receptor related precursor (AA -19 to 4525)                                        | 109   | 523119    | 5       | 1            | plays a central role in mammalian cholesterol metabolism                                                        |
|         | 45 gi 799177    | 100 kDa coactivator                                                                    | 57    | 100313    | 2       | 2,1          | lipid droplet-binding protein                                                                                   |
| B5      |                 |                                                                                        |       |           |         |              |                                                                                                                 |
| Hit No. | Accession No.   | Protein Description                                                                    | Score | Mass [Da] | Matches | Coverage [%] |                                                                                                                 |
|         | 6 gi 6470150    | BiP protein, partial                                                                   | 576   | 71002     | 16      | 25,2         | glucose-regulated protein (grp78), ER chaperone                                                                 |
|         | 9 gi 577295     | KIAA0088                                                                               | 407   | 107158    | 18      | 15,3         | ER protein, glycosidase                                                                                         |
|         | 13 gi 10716563  | calnexin precursor                                                                     | 297   | 67982     | 12      | 10,1         | ER protein                                                                                                      |
|         | 15 gi 182855    | 80K-H protein                                                                          | 277   | 60228     | 14      | 10,4         | contains low density lipoprotein receptor class A domain, cholesterol metabolism                                |
|         | 27 gi 1049053   | encodes region of fatty acid synthase activity; FAS; multifunctional protein           | 172   | 275553    | 5       | 1,8          |                                                                                                                 |
|         | 32 gi 4757756   | annexin A2 isoform 2                                                                   | 135   | 38808     | 4       | 8,8          | calcium-dependent phospholipid-binding protein                                                                  |
|         | 37 gi 6424942   | ALG-2 interacting protein 1                                                            | 124   | 96646     | 3       | 4,1          | mannosyltransferase in ER                                                                                       |
|         | 45 gi 6005942   | transitional endoplasmic reticulum ATPase                                              | 84    | 89950     | 3       | 5,2          | ER protein                                                                                                      |
|         | 49 gi 34339     | LDL-receptor related precursor (AA -19 to 4525)                                        | 75    | 523119    | 3       | 0,6          | plays a central role in mammalian cholesterol metabolism                                                        |
|         | 51 gi 15559717  | AP2A1 protein                                                                          | 72    | 109096    | 1       | 1            | involved in the formation of clathrin-coated pits                                                               |
| B6      |                 |                                                                                        |       |           |         |              |                                                                                                                 |
| Hit No. | Accession No.   | Protein Description                                                                    | Score | Mass [Da] | Matches | Coverage [%] |                                                                                                                 |
|         | 4 gi 62414289   | vimentin                                                                               | 871   | 53676     | 35      | 45,3         | intermediate filament - associated with perilipin                                                               |
|         | 8 gi 862457     | enoyl-CoA hydratase/3-hydroxyacyl-CoA dehydrogenase α-subunit of trifunctional protein | 579   | 83648     | 20      | 22,7         | hydrates the double bond between the second & third carb ons onacyl- CoA, essential to metabolizing fatty acids |
|         | 10 gi 4506675   | dolichyl-diphosphooligosaccharide–protein glycosyltransferase subunit 1 precursor      | 490   | 68641     | 19      | 21,4         | sugar transfer from dolichol-phosphate -sugars occurs exclusively on the luminal side of ER                     |
|         | 11 gi 20072835  | ACSL1 protein, partial                                                                 | 474   | 60800     | 19      | 19,7         | adipocytokine pathway                                                                                           |
|         | 13 gi 179930    | carboxylesterase, partial                                                              | 413   | 56446     | 8       | 18,1         |                                                                                                                 |
|         | 16 gi 2851393   | RecName: Full=NADPH–cytochrome P450 reductase; Short=CPR; Short=P450R                  | 352   | 77097     | 10      | 19,4         | cytoplasmic side of ER, functions in desaturation and elongation of fatty acids                                 |
|         | 18 gi 35218     | unnamed protein product                                                                | 348   | 76154     | 11      | 19,2         | membrane-associated Ca2+–binding protein p68, annexin domains                                                   |
|         | 22 gi 183008    | glucocerebrosidase precursor (5' end put.); putative                                   | 298   | 57798     | 9       | 12           |                                                                                                                 |
|         | 38 gi 3273228   | very-long-chain acyl-CoA dehydrogenase                                                 | 154   | 70848     | 4       | 8,2          | catalyzes the initial step of mitochondrial beta-oxidation of long-chain fatty acids                            |
|         | 47 gi 303618    | phospholipase C-alpha                                                                  | 108   | 57065     | 3       | 6,1          |                                                                                                                 |
|         | 66 gi 3041771   | perilipin                                                                              | 59    | 56201     | 2       | 2,7          | lipid-droplet-binding                                                                                           |
| B7      |                 |                                                                                        |       |           |         |              |                                                                                                                 |
| Hit No. | Accession No.   | Protein Description                                                                    | Score | Mass [Da] | Matches | Coverage [%] |                                                                                                                 |
|         | 1 gi 62414289   | vimentin                                                                               | 1676  | 53676     | 93      | 62           | intermediate filament - associated with perilipin                                                               |
|         | 3 gi 220702506  | Chain A, TapasinERP57 HETERODIMER                                                      | 897   | 54541     | 36      | 44,7         | catalyzing the formation of disulfide bonds of newly synthesized polypeptides in the ER                         |
|         | 4 gi 35655      | unnamed protein product                                                                | 845   | 57458     | 40      | 42,7         | protein disulfide isomerase (PDia), involved in oxidative protein folding in the ER                             |
|         | 11 gi 1710248   | protein disulfide isomerase-related protein 5                                          | 412   | 46512     | 16      | 18,8         | ER protein                                                                                                      |
|         | 21 gi 159162689 | Chain A, Human Protein Disulfide Isomerase, Nmr, 40 Structures                         | 256   | 13363     | 7       | 42,5         | ER protein                                                                                                      |
|         | 22 gi 4757900   | calreticulin precursor                                                                 | 194   | 48283     | 7       | 12           | ER protein                                                                                                      |
|         | 26 gi 194388786 | unnamed protein product                                                                | 143   | 41544     | 5       | 10,5         | prenylcysteine lyase                                                                                            |



| <b>B8</b> |               |                                                 |       |           |         |              |
|-----------|---------------|-------------------------------------------------|-------|-----------|---------|--------------|
| Hit No.   | Accession No. | Protein Description                             | Score | Mass [Da] | Matches | Coverage [%] |
| 1         | gi 62414289   | vimentin                                        | 1532  | 53676     | 87      | 63,5         |
| 3         | gi 32454741   | serpin H1 precursor                             | 1127  | 46525     | 72      | 61,5         |
| 8         | gi 18379349   | synaptic vesicle membrane protein VAT-1 homolog | 444   | 42122     | 20      | 26,2         |
| 13        | gi 9836652    | BSCv                                            | 326   | 47887     | 11      | 19,8         |
| 19        | gi 1710248    | protein disulfide isomerase-related protein 5   | 273   | 46512     | 6       | 15,9         |
| 26        | gi 860986     | protein disulfide isomerase                     | 197   | 57043     | 6       | 15,8         |
| 35        | gi 3043670    | KIAA0573 protein                                | 157   | 52282     | 5       | 5,5          |
| 53        | gi 3095186    | cargo selection protein TIP47                   | 76    | 47175     | 2       | 3,9          |
| 62        | gi 5031699    | flotillin-1                                     | 56    | 47554     | 2       | 4,2          |
| 63        | gi 181184     | stomatin peptide                                | 56    | 31860     | 1       | 2,8          |
| 64        | gi 4757756    | annexin A2 isoform 2                            | 55    | 38808     | 3       | 9,7          |

| <b>B9</b> |               |                                                             |       |           |         |              |
|-----------|---------------|-------------------------------------------------------------|-------|-----------|---------|--------------|
| Hit No.   | Accession No. | Protein Description                                         | Score | Mass [Da] | Matches | Coverage [%] |
| 1         | gi 4757756    | annexin A2 isoform 2                                        | 1357  | 38808     | 85      | 62,8         |
| 6         | gi 4503327    | NADH-cytochrome b5 reductase 3 isoform 1                    | 522   | 34441     | 32      | 33,2         |
| 12        | gi 119609105  | prohibitin 2                                                | 420   | 32262     | 12      | 41,2         |
| 13        | gi 340219     | vimentin                                                    | 420   | 53738     | 16      | 29,2         |
| 15        | gi 4502101    | annexin A1                                                  | 351   | 38918     | 11      | 26,9         |
| 48        | gi 6005721    | erlin-2 isoform 1                                           | 131   | 38044     | 3       | 7,1          |
| 51        | gi 8393516    | sterol-4-alpha-carboxylate 3-dehydrogenase, decarboxylating | 115   | 42159     | 3       | 11,8         |
| 53        | gi 178849     | apolipoprotein E                                            | 109   | 36302     | 4       | 10,4         |
| 56        | gi 5031765    | corticosteroid 11-beta-dehydrogenase isozyme 1              | 100   | 32608     | 3       | 7,2          |
| 57        | gi 1743867    | acid ceramidase                                             | 100   | 45077     | 3       | 5,8          |
| 58        | gi 15826034   | Chain A, Apolipoprotein E3 22kd Fragment Lys146Gln Mutant   | 98    | 22174     | 4       | 17,3         |
| 59        | gi 181184     | stomatin peptide                                            | 97    | 31860     | 2       | 6,9          |
| 92        | gi 179832     | calnexin                                                    | 41    | 67948     | 1       | 2,7          |

| <b>B10</b> |               |                                                                                            |       |           |         |              |
|------------|---------------|--------------------------------------------------------------------------------------------|-------|-----------|---------|--------------|
| Hit No.    | Accession No. | Protein Description                                                                        | Score | Mass [Da] | Matches | Coverage [%] |
| 7          | gi 181184     | stomatin peptide                                                                           | 719   | 31860     | 41      | 41,7         |
| 18         | gi 809185     | Chain A, Metal Binding On The Structure Of Annexin V And Implications For Membrane Binding | 500   | 35840     | 16      | 30,1         |
| 25         | gi 6647832    | Membrane-associated progesterone receptor component 2; Steroid receptor protein DG6        | 279   | 23861     | 5       | 22,4         |
| 28         | gi 4505773    | prohibitin                                                                                 | 247   | 29843     | 6       | 23,5         |
| 32         | gi 1020320    | CDM protein                                                                                | 152   | 14066     | 7       | 18,9         |
| 48         | gi 5803013    | endoplasmic reticulum resident protein 29 isoform 1 precursor                              | 101   | 29032     | 3       | 6,5          |
| 50         | gi 4757756    | annexin A2 isoform 2                                                                       | 85    | 38808     | 4       | 6,2          |
| 58         | gi 340219     | vimentin                                                                                   | 62    | 53738     | 1       | 2,1          |
| 60         | gi 181557     | NADH cytochrome b5 reductase (EC 1.6.2.2), partial                                         | 60    | 31394     | 1       | 4            |

| <b>B11</b> |               |                                                                                     |       |           |         |              |
|------------|---------------|-------------------------------------------------------------------------------------|-------|-----------|---------|--------------|
| Hit No.    | Accession No. | Protein Description                                                                 | Score | Mass [Da] | Matches | Coverage [%] |
| 20         | gi 2852648    | unknown                                                                             | 485   | 22435     | 19      | 47,4         |
| 40         | gi 15451856   | caveolin-1 isoform alpha                                                            | 190   | 20630     | 8       | 25,8         |
| 42         | gi 340219     | vimentin                                                                            | 183   | 53738     | 6       | 12,2         |
| 47         | gi 6857802    | ER lumen protein retaining receptor 3 isoform a                                     | 136   | 25238     | 4       | 18,7         |
| 52         | gi 5729875    | membrane-associated progesterone receptor component 1                               | 111   | 21772     | 5       | 15,9         |
| 63         | gi 181557     | NADH cytochrome b5 reductase (EC 1.6.2.2), partial                                  | 77    | 31394     | 1       | 4            |
| 66         | gi 6647832    | Membrane-associated progesterone receptor component 2; Steroid receptor protein DG6 | 70    | 23861     | 2       | 12,6         |
| 68         | gi 181184     | stomatin peptide                                                                    | 67    | 31860     | 1       | 2,8          |
| 82         | gi 10880989   | ras-related protein Rab-18 isoform 1                                                | 47    | 23248     | 1       | 5,3          |

| <b>B12</b> |               |                       |       |           |         |              |
|------------|---------------|-----------------------|-------|-----------|---------|--------------|
| Hit No.    | Accession No. | Protein Description   | Score | Mass [Da] | Matches | Coverage [%] |
| 28         | gi 340219     | vimentin              | 173   | 53738     | 8       | 13,3         |
| 35         | gi 4757756    | annexin A2 isoform 2  | 155   | 38808     | 6       | 10           |
| 41         | gi 4972627    | caveolin 1            | 126   | 13237     | 4       | 37,2         |
| 75         | gi 181184     | stomatin peptide      | 59    | 31860     | 2       | 2,8          |
| 82         | gi 4505893    | proteolipid protein 2 | 52    | 17022     | 2       | 8,6          |

| <b>B13</b> |               |                      |       |           |         |              |
|------------|---------------|----------------------|-------|-----------|---------|--------------|
| Hit No.    | Accession No. | Protein Description  | Score | Mass [Da] | Matches | Coverage [%] |
| 39         | gi 4757756    | annexin A2 isoform 2 | 47    | 38808     | 2       | 6,8          |
